# Supplementary material for: Structures of the conformational isomers and polymorph modifications of N-substituted 2,6-(E,E)-bis(ferrocenylidene)piperid-4-ones: photo- and electrochemically induced E/Z isomerization
Source: Royal Society of Chemistry journal article supplement (doi:10.1039/c5ce01111f), 2015-01-01
Supplement: c5ce01111f1.pdf [file c5ce01111f1.pdf]

Electronic supplementary information for

Structures of the Conformational Isomers and Polymorph Modifications of N-substituted 2,6-(E,E)-bis(ferrocenylidene)piperid-4-ones: photo- and electrochemically induced E/Z isomerization

Alexander S. Romanov,<sup>a,b\*</sup> Alexey V. Shapovalov,<sup>a</sup> Gary F. Angles,<sup>b</sup> Tatiana V. Timofeeva,<sup>b</sup> Maddalena Corsini,<sup>c</sup> Stefania Fusi,<sup>c</sup> and Fabrizia Fabrizi de Biani<sup>c,\*</sup>

<sup>a</sup>Institute of Organoelement Compounds, Russian Academy of Sciences, 119991 Moscow, Russian Federation,

<sup>b</sup>Department of Natural Sciences, New Mexico Highlands University, Las Vegas, New Mexico 87701,

<sup>c</sup>Dipartimento di Biotecnologie, Chimica e Farmacia, Università di Siena, 53100 Siena, Italy

**Table S1.** <sup>1</sup>H NMR data of the compounds **1–4** (300 MHz, CD<sub>2</sub>Cl<sub>2</sub>,  $\delta$  in ppm) and their protonated forms (300 MHz, CD<sub>2</sub>Cl<sub>2</sub>,  $\delta$  in ppm)

| Compound | C <sub>5</sub> H <sub>5</sub> | C <sub>5</sub> H <sub>4</sub>                                  | CH <sub>2</sub>               | CH             | NR (R = H, Me, Et, CH <sub>2</sub> Ph)                                                                      |
|----------|-------------------------------|----------------------------------------------------------------|-------------------------------|----------------|-------------------------------------------------------------------------------------------------------------|
| <b>1</b> | 4.17 s<br>(10H)               | 4.50 br t (4H), J = 1.2<br>Hz<br>4.54 br t (4H), J = 1.2<br>Hz | 3.94 br s (4H)                | 7.52 s<br>(2H) | 1.97 br s (1H, NH)                                                                                          |
|          | 4.22 s<br>(10H)               | 4.55 br s (4H)<br>4.51 br s (4H)                               | 3.68 br s (4H)                | 7.60 s<br>(2H) | 2.56 br s (3H, NMe)                                                                                         |
| <b>3</b> | 4.18 s<br>(10H)               | 4.51 t (4H), J = 1.8 Hz<br>4.45 t (4H), J = 1.8 Hz             | 3.61 br d (4H), J =<br>1.5 Hz | 7.52 s<br>(2H) | 2.66 quad (2H, NCH <sub>2</sub> ), J = 6.9 Hz<br>1.18 t (3H, NCH <sub>2</sub> CH <sub>3</sub> ), J = 6.9 Hz |

|                            |                            |                                  |                                  |                |                                                                                                                                                                                 |
|----------------------------|----------------------------|----------------------------------|----------------------------------|----------------|---------------------------------------------------------------------------------------------------------------------------------------------------------------------------------|
| <b>4</b>                   | 4.05 s<br>(10H)            | 4.42-4.40 overlapping<br>m (8H)  | 3.63 br d (4H), J =<br>1.5 Hz    | 7.50 s<br>(2H) | 3.78 s (2H, NCH <sub>2</sub> Ph),<br>7.45-7.42 m (2H, NCH <sub>2</sub> Ph, meta)<br>7.38-7.33 m (2H, NCH <sub>2</sub> Ph, ortho)<br>7.30-7.24 m (1H, NCH <sub>2</sub> Ph, para) |
|                            | <b>2</b> ·HBF <sub>4</sub> | 4.85 s<br>(10H)                  | 5.72 br s (4H)<br>5.25 br s (4H) | 4.46 br s (4H) | 8.24 s<br>(2H)                                                                                                                                                                  |
| <b>3</b> ·HBF <sub>4</sub> | 4.30 s<br>(10H)            | 4.66 br s (4H)<br>4.46 br s (4H) | 4.73 br s (2H)<br>4.57 br s (2H) | 7.97 s<br>(2H) | 8.56 (br s, NH), 3.21 br s (2H, NCH <sub>2</sub> ), 1.30 br s<br>(3H, NCH <sub>2</sub> CH <sub>3</sub> )                                                                        |
| <b>4</b> ·HBF <sub>4</sub> | 4.98 s<br>(10H)            | 5.84 br s (4H)<br>5.31 br s (4H) | 4.71 br s (2H)<br>4.51 br s (2H) | 7.96 s<br>(2H) | 7.73 (br s, NH), 4.32 s (2H, NCH <sub>2</sub> Ph),<br>7.56 br s m (5H, NCH <sub>2</sub> Ph)                                                                                     |

**Table S2.** <sup>13</sup>C NMR data of the compounds **1**, **2**, **3**, and **4** (75 MHz, CD<sub>2</sub>Cl<sub>2</sub>, δ in ppm)

| Compound                      | <b>1</b> | <b>2</b>       | <b>3</b>                                      | <b>4</b>                       |
|-------------------------------|----------|----------------|-----------------------------------------------|--------------------------------|
| C <sub>5</sub> H <sub>5</sub> | 69.83    | 69.83          | 69.68                                         | 69.80                          |
| C <sub>5</sub> H <sub>4</sub> | 71.54    | 71.52          | 71.36                                         | 71.48                          |
|                               | 71.38    | 71.42          | 71.19                                         | 71.28                          |
| C <sub>ipso</sub> Fc          | 79.13    | 78.75          | 78.87                                         | 78.78                          |
| CH=                           | 135.76   | 137.02         | 136.06                                        | 136.22                         |
| CH <sub>2</sub>               | 48.11    | 56.53          | 54.42                                         | 55.09                          |
| C                             | 132.07   | 129.43         | 130.40                                        | 138.62                         |
| NR                            | –        | 45.38 (R = Me) | 51.77 (R = NCH <sub>2</sub> CH <sub>3</sub> ) | 62.85 (R = CH <sub>2</sub> Ph) |

|     |                                               |        |                                                         |        |
|-----|-----------------------------------------------|--------|---------------------------------------------------------|--------|
|     | 12.61 (R = NCH <sub>2</sub> CH <sub>3</sub> ) |        | 130.67, 129.43, 128.79, 127.70 (R = CH <sub>2</sub> Ph) |        |
| C=O | 185.68                                        | 184.36 | 185.14                                                  | 185.19 |

**Table S3.** Crystal data, data collection and structure refinement parameters for **2**, **3** and salts **2**·HBF<sub>4</sub> and **4**·HBF<sub>4</sub>.

|                      | <b>2</b>                                           | <b>3</b>                                           | <b>2</b> ·HBF <sub>4</sub><br>(Triclinic)                          | <b>2</b> ·HBF <sub>4</sub><br>(Monoclinic)                         | <b>4</b> ·HBF <sub>4</sub>                                         |
|----------------------|----------------------------------------------------|----------------------------------------------------|--------------------------------------------------------------------|--------------------------------------------------------------------|--------------------------------------------------------------------|
| Empirical formula    | C <sub>28</sub> H <sub>27</sub> Fe <sub>2</sub> NO | C <sub>29</sub> H <sub>29</sub> Fe <sub>2</sub> NO | C <sub>28</sub> H <sub>28</sub> BF <sub>4</sub> Fe <sub>2</sub> NO | C <sub>28</sub> H <sub>28</sub> BF <sub>4</sub> Fe <sub>2</sub> NO | C <sub>34</sub> H <sub>32</sub> BF <sub>4</sub> Fe <sub>2</sub> NO |
| Molecular weight     | 505.21                                             | 519.23                                             | 593.02                                                             | 593.02                                                             | 669.12                                                             |
| Crystal system       | Monoclinic                                         | Monoclinic                                         | Triclinic                                                          | Monoclinic                                                         | Monoclinic                                                         |
| Space group          | <i>P2<sub>1</sub></i>                              | <i>P2<sub>1</sub></i>                              | <i>P-1</i>                                                         | <i>P2<sub>1</sub>/c</i>                                            | <i>C2/c</i>                                                        |
| Crystal color, habit | red, plate                                         | red, plate                                         | black, plate                                                       | black, prism                                                       | black, plate                                                       |
| Crystal size (mm)    | 0.29 × 0.23 ×<br>0.06                              | 0.17 × 0.11 ×<br>0.05                              | 0.21 × 0.26 ×<br>0.42                                              | 0.29 × 0.31 × 0.49                                                 | 0.09 × 0.15 ×<br>0.20                                              |
| a (Å)                | 5.9820(7)                                          | 6.012(3)                                           | 12.7933(6)                                                         | 15.2280(8)                                                         | 29.902(4)                                                          |
| b (Å)                | 12.7479(15)                                        | 12.956(6)                                          | 13.4321(7)                                                         | 14.2504(8)                                                         | 7.6059(11)                                                         |
| c (Å)                | 14.4154(17)                                        | 14.400(7)                                          | 15.0676(8)                                                         | 11.8362(6)                                                         | 28.606(5)                                                          |
| α (°)                | 90                                                 | 90                                                 | 107.1180(10)                                                       | 90                                                                 | 90                                                                 |

---

|                                                         |               |               |               |               |               |
|---------------------------------------------------------|---------------|---------------|---------------|---------------|---------------|
| $\beta$ (°)                                             | 95.467(3)     | 94.957(8)     | 91.0530(9)    | 110.2650(10)  | 110.776(3)    |
| $\gamma$ (°)                                            | 90            | 90            | 93.3580(10)   | 90            | 90            |
| V (Å <sup>3</sup> )                                     | 1094.3(2)     | 1117.6(9)     | 2468.6(2)     | 2409.5(2)     | 6082.7(15)    |
| Z                                                       | 2             | 2             | 4             | 4             | 8             |
| D <sub>calc</sub> (g cm <sup>-3</sup> )                 | 1.533         | 1.543         | 1.596         | 1.635         | 1.461         |
| 2 $\theta$ <sub>max</sub> (°)                           | 28.00         | 26.00         | 28.00         | 26.00         | 26.00         |
| Abs. coeff., $\mu$ (Mo-K $\alpha$ ) (cm <sup>-1</sup> ) | 1.347         | 1.321         | 1.229         | 1.259         | 1.007         |
| Absorption correction                                   |               |               | SADABS        |               |               |
| T <sub>max</sub> /T <sub>min</sub>                      | 0.9235/0.6960 | 0.9369/0.8066 | 0.7824/0.6263 | 0.7116/0.5774 | 0.9148/0.8240 |
| Number of collected reflections                         | 16333         | 10471         | 28268         | 22825         | 5979          |
| Number of independent reflections                       | 5221          | 4391          | 11899         | 4739          | 5810          |
| Number of observed reflections (I > 2 $\sigma$ (I))     | 4956          | 3235          | 9556          | 4128          | 3572          |
| R <sub>int</sub>                                        | 0.0250        | 0.0866        | 0.0258        | 0.0262        | N/A           |
| Number of parameters                                    | 289           | 292           | 705           | 326           | 361           |

---

|                                                                     |                                                                            |              |              |              |              |
|---------------------------------------------------------------------|----------------------------------------------------------------------------|--------------|--------------|--------------|--------------|
| R <sub>1</sub> (on F for observed reflexions) <sup>a</sup>          | 0.0389                                                                     | 0.0556       | 0.0620       | 0.0355       | 0.0663       |
| wR <sub>2</sub> (on F <sup>2</sup> for all reflexions) <sup>b</sup> | 0.1016                                                                     | 0.1331       | 0.1694       | 0.0980       | 0.1765       |
| Weighting scheme                                                    | $w^{-1} = \sigma^2(F_o^2) + (aP)^2 + bP$ , where $P = 1/3(F_o^2 + 2F_c^2)$ |              |              |              |              |
| A                                                                   | 0.05                                                                       | 0.54         | 0.08         | 0.05         | 0.085        |
| B                                                                   | 2.2                                                                        | 0.01         | 8.1          | 3.5          | 15.0         |
| F(000)                                                              | 524                                                                        | 540          | 1216         | 1216         | 2752         |
| GOF                                                                 | 1.002                                                                      | 1.012        | 1.021        | 1.050        | 1.099        |
| $\Delta\rho_{\max}/\Delta\rho_{\min}$ (e Å <sup>-3</sup> )          | 1.388/−0.584                                                               | 1.091/−0.884 | 1.678/−1.420 | 1.202/−0.558 | 1.044/−1.431 |

$$^a R_1 = \frac{\sum |F_o| - \sum |F_c|}{\sum (F_o)}$$

$$^b wR_2 = \left\{ \frac{\sum [w(F_o^2 - F_c^2)^2]}{\sum w(F_o^2)^2} \right\}^{1/2}$$

**Table S4.** Intermolecular and intramolecular hydrogen bonds (Å, °) found for **2**, **3** and salts **2**·HBF<sub>4</sub> and **4**·HBF<sub>4</sub>.

| Compound                                | D–H···A                      | d(D–H)  | d(H···A) | d(D···A) | DHA      |
|-----------------------------------------|------------------------------|---------|----------|----------|----------|
| <b>2</b>                                | C27A–H27A <sup>a</sup> ···O1 | 1.00    | 2.34     | 3.237(4) | 149.3(2) |
| <b>3</b>                                | C27A–H27A <sup>a</sup> ···O1 | 1.00    | 2.40     | 3.279(8) | 145.9(5) |
|                                         | C7B–H7B <sup>b</sup> ···O1   | 1.00    | 2.70     | 3.603(8) | 156.4(5) |
|                                         | C14C–H14C <sup>c</sup> ···N1 | 1.00    | 2.60     | 3.562(7) | 162.0(5) |
| <b>2</b> ·HBF <sub>4</sub> (Monoclinic) | N1A–H1A <sup>d</sup> ···O1   | 0.98(5) | 1.88(5)  | 2.837(5) | 163.0(3) |

|                                      |                           |         |         |           |          |
|--------------------------------------|---------------------------|---------|---------|-----------|----------|
|                                      | C3–H3A…F1                 | 1.00    | 2.42    | 3.279(5)  | 145.3(4) |
|                                      | C3–H3A…F4                 | 1.00    | 2.66    | 3.405(6)  | 132.4(4) |
|                                      | C6A–H6A <sup>e</sup> …F3  | 1.00    | 2.40    | 3.335(6)  | 168.2(5) |
|                                      | C17–H17A…F3               | 1.00    | 2.39    | 3.293(6)  | 149.2(5) |
|                                      | C26–H26A…F4               | 1.00    | 2.51    | 3.452(6)  | 156.4(5) |
| <b>2·HBF<sub>4</sub> (Triclinic)</b> | N1A–H1A…F5                | 0.93(7) | 1.88(7) | 2.808(7)  | 176.1(6) |
|                                      | C3A–H3AB…F2               | 1.00    | 2.41    | 3.261(7)  | 143.1(6) |
|                                      | C3A–H3AB…F4               | 1.00    | 2.43    | 3.333(7)  | 150.7(6) |
|                                      | C4–H4AA…F4                | 1.00    | 2.46    | 3.354(8)  | 149.7(6) |
|                                      | C15A–H15A…F8              | 1.00    | 2.62    | 3.298(5)  | 125.2(5) |
|                                      | C25A–H25B…F5              | 1.00    | 2.62    | 3.563(5)  | 156.8(5) |
|                                      | N1B–H1B…O1AB <sup>f</sup> | 0.92(7) | 2.01(7) | 2.706(5)  | 130.5(6) |
|                                      | N1B–H1B…F8A <sup>f</sup>  | 0.92(7) | 2.36(7) | 2.960(5)  | 122.7(6) |
|                                      | C3B–H3BB…F1 <sup>f</sup>  | 1.00    | 2.34    | 3.244(6)  | 150.9(6) |
|                                      | C4B–H4BA…F8 <sup>f</sup>  | 1.00    | 2.40    | 2.987(6)  | 117.4(6) |
|                                      | C7B–C7BA…F6               | 1.00    | 2.24    | 3.160(6)  | 155.9(6) |
|                                      | C18B–H18B…F1              | 1.00    | 2.43    | 3.120(7)  | 125.4(6) |
| <b>4·HBF<sub>4</sub></b>             | N1–H1A…F4A <sup>g</sup>   | 0.93(5) | 1.55(5) | 2.466(9)  | 167.2(7) |
|                                      | C28–H28A…F4 <sup>g</sup>  | 1.00    | 2.45    | 3.375(10) | 148.4(7) |
|                                      | C7–H7A…F1                 | 1.00    | 2.17    | 2.913(11) | 130.7(7) |
|                                      | C3–H3A…F3                 | 1.00    | 2.06    | 2.941(9)  | 147.4(7) |

Symmetry transformations used to generate equivalent atoms:  $^a = 1 + x, y, z$ ;  $^b = 2 - x, -1/2 + y, -z$ ;  $^c = 2 - x, 1/2 + y, -z$ ;  $^d = -x, 1 - y, 1 - z$ ;  $^e = x, 3/2 - y, 1/2 + z$ ;  $^f = x, 1 + y, z$ ;  $^g = x, -1 + y, z$ .
